# Supplementary material
Source: PubMed Central journal article supplement (PMC4102964)

## Supporting Information

Supplemental Figure.

An expanded Y-axis (SUV) plot of the Figure 2 broken line radioactivity vs. time curves in rat brain afforded from the challenged scans (non-radioactive **4**, 2.0 mg/kg, given i.v. 10 minutes prior to the i.v. injection of tracer [ $^{18}\text{F}$ ]**4**); shown as averaged ( $n = 3$ ), decay-corrected, and subject normalized (SUV) curves with standard error measure bars that were determined within select regions of interest defined per the legend as: hind brain/brain stem (BS), caudate-putamen (CP), frontal cortex (FrCtx), mid-brain (MB), TH thalamus (TH), and cerebellum (CE).

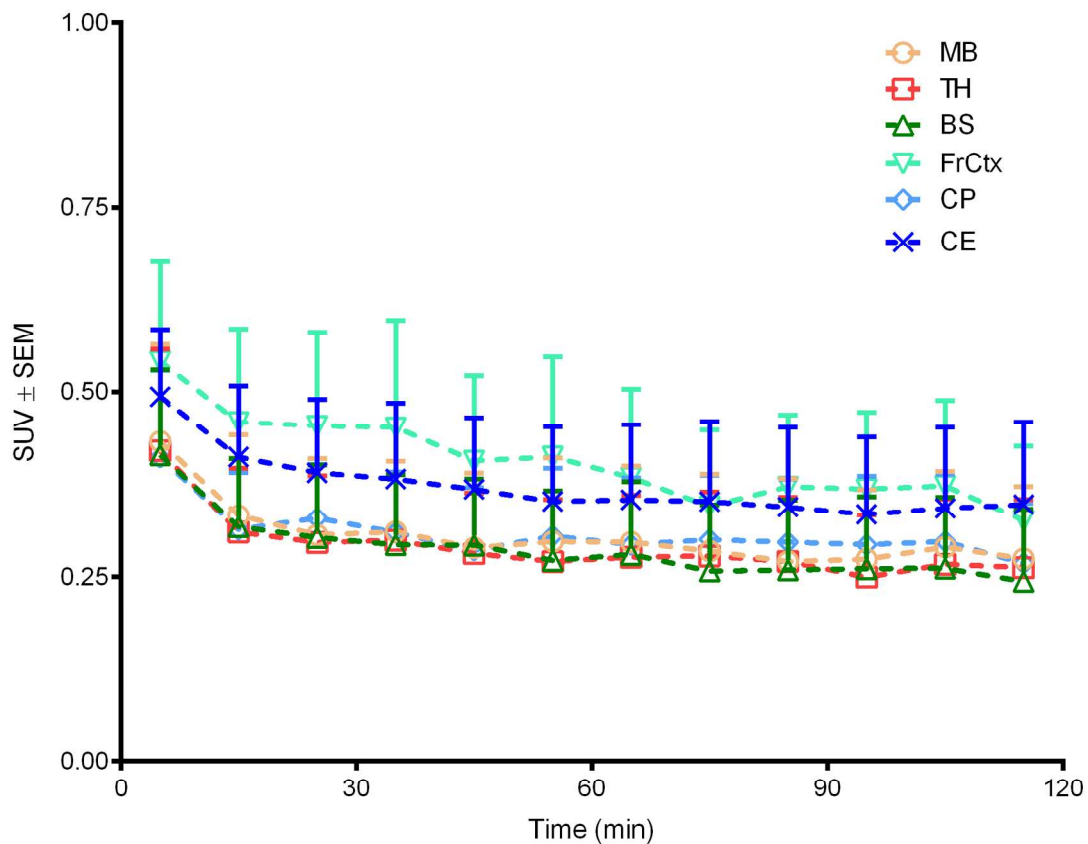

Supplement: cn500024c_si_001.pdf [file cn500024c_si_001.pdf]
